# Supplementary material
Source: MDPI journal article supplement (https://www.mdpi.com/2039-4713/13/4/40)
Supplement: s1 [file s1]

| Sample | Shape | Size (mm) | Colour      | Chemical composition | Score |
|--------|-------|-----------|-------------|----------------------|-------|
| B13    | fiber | 0.76      | transparent | cellulose            | 0.73  |
| B29    | fiber | 0.68      | red         | cellulose            | 0.86  |
| B33    | fiber | 1.25      | transparent | cellulose            | 0.76  |
| B14    | fiber | 1.29      | violet      | cellulose            | 0.80  |
| B18    | fiber | 1.19      | blue        | cellulose            | 0.73  |
| B39    | fiber | 1.13      | blue        | cellulose            | 0.79  |
| B31    | fiber | 2.41      | black       | cellulose            | 0.81  |
| B15    | fiber | 2.56      | brown       | rayon                | 0.80  |

Table S2: Anthropogenic particles found in blanks.
