# Supplementary material
Source: MDPI journal article supplement (https://www.mdpi.com/2039-4713/13/4/40)
Supplement: s1 [file s1]

Table S3: Anthropogenic particles found in fish.

| Fish             | Origin | Organ  | Shape    | Size (mm) | Colour      | Chemical composition | Score |
|------------------|--------|--------|----------|-----------|-------------|----------------------|-------|
| <i>S. aurata</i> | Greece | GIT    | fiber    | 1.62      | transparent | polyester            | 0.75  |
|                  |        |        | fragment | 0.52      | red         | fat                  | 0.85  |
|                  |        |        | fragment | 0.26      | brown       | fat                  | 0.71  |
|                  |        | muscle | fiber    | 0.96      | red         | cellulose            | 0.89  |
| <i>D. labrax</i> | Greece | GIT    | fragment | 0.42      | black       | cellulose            | 0.93  |
| <i>D. labrax</i> | Italy  | GIT    | fiber    | 0.34      | black       | fat                  | 0.74  |
|                  |        |        | fiber    | 0.58      | transparent | cellulose            | 0.77  |
|                  |        |        | fiber    | 0.28      | black       | cellulose            | 0.79  |
|                  |        |        | fiber    | 2.43      | black       | cellulose            | 0.80  |
|                  |        |        | fiber    | 0.64      | grey        | cellulose            | 0.79  |
|                  |        |        | fiber    | 0.87      | blue        | cellulose            | 0.75  |
| <i>S. aurata</i> | Italy  | GIT    | fiber    | 0.41      | blue        | aluminum sulfate     | 0.82  |
|                  |        |        | fiber    | 0.37      | blue        | natural polyamide    | 0.84  |
|                  |        |        | fiber    | 2.27      | transparent | cellulose            | 0.82  |
|                  |        | liver  | fiber    | 0.54      | red         | cellulose            | 0.72  |
| <i>D. labrax</i> | Greece | GIT    | fiber    | 0.97      | black       | fat                  | 0.7   |
|                  |        |        | fiber    | 0.50      | transparent | fat                  | 0.73  |
|                  |        |        | fiber    | 0.61      | black       | cellulose            | 0.72  |
| <i>D. labrax</i> | Turkey | GIT    | fragment | 0.11      | black       | fat                  | 0.72  |
|                  |        |        | fiber    | 0.24      | blue        | natural polyamide    | 0.75  |
|                  |        |        | fiber    | 0.33      | violet      | cellulose            | 0.70  |
|                  |        |        | fiber    | 0.25      | transparent | cellulose            | 0.70  |
| <i>S. aurata</i> | Greece | GIT    | fiber    | 0.40      | transparent | cellulose            | 0.70  |
| <i>D. labrax</i> | Greece | GIT    | fiber    | 0.83      | black       | natural polyamide    | 0.83  |
|                  |        |        | fiber    | 2.26      | red         | cellulose            | 0.83  |
|                  |        |        | fiber    | 0.72      | black       | cellulose            | 0.74  |
|                  |        |        | fiber    | 1.51      | red         | cellulose            | 0.73  |
| <i>S. aurata</i> | Greece | GIT    | fiber    | 1.54      | black       | cellulose            | 0.77  |
|                  |        |        | fiber    | 0.85      | transparent | polyamide            | 0.93  |
|                  |        |        | fiber    | 1.88      | transparent | polyamide            | 0.87  |
| <i>D. labrax</i> | Italy  | GIT    | fiber    | 1.01      | blue        | cellulose            | 0.75  |
| <i>S. aurata</i> | Turkey | GIT    | fragment | 1.30      | green       | polypropylene        | 0.97  |
|                  |        | muscle | fiber    | 1.92      | black       | cellulose            | 0.76  |
| <i>S. aurata</i> | Greece | GIT    | fiber    | 0.76      | transparent | cellulose            | 0.76  |
|                  |        | muscle | fiber    | 1.50      | transparent | cellulose            | 0.85  |
|                  |        |        | fragment | 0.05      | red         | fat                  | 0.81  |
| <i>D. labrax</i> | Turkey | GIT    | fiber    | 0.58      | black       | polyester            | 0.80  |
|                  |        |        | fiber    | 0.28      | blue        | epoxy resin          | 0.71  |
|                  |        |        | fragment | 0.22      | yellow      | natural polyamide    | 0.77  |
|                  |        | liver  | fiber    | 0.39      | brown       | cellulose            | 0.89  |
|                  |        |        | fiber    | 1.07      | transparent | cellulose            | 0.78  |
|                  |        |        | fiber    | 0.39      | blue        | cellulose            | 0.74  |
|                  |        |        | fiber    | 0.19      | blue        | cellulose            | 0.74  |
|                  |        |        | fiber    | 0.62      | violet      | cellulose            | 0.73  |
|                  |        |        | fiber    | 1.30      | blue        | polyamide            | 0.69  |
| <i>S. aurata</i> | Greece | liver  | fiber    | 0.82      | brown       | cellulose            | 0.79  |
|                  |        |        | fiber    | 0.63      | black       | cellulose            | 0.77  |
|                  |        |        | fiber    | 2.59      | transparent | cellulose            | 0.75  |
| <i>D. labrax</i> | Greece | liver  | fiber    | 0.32      | transparent | natural polyamide    | 0.78  |
|                  |        |        | fiber    | 2.20      | blue        | natural polyamide    | 0.76  |
|                  |        |        | fiber    | 1.31      | transparent | cellulose            | 0.88  |
|                  |        |        | fiber    | 1.07      | transparent | cellulose            | 0.85  |
|                  |        |        | fiber    | 1.46      | transparent | cellulose            | 0.82  |
|                  |        |        | fiber    | 0.68      | blue        | cellulose            | 0.84  |
|                  |        | GIT    | fiber    | 0.68      | violet      | cellulose            | 0.78  |
|                  |        |        | fragment | 0.25      | transparent | cellulose            | 0.79  |
|                  |        |        | fiber    | 0.63      | blue        | cellulose            | 0.76  |
|                  |        |        | fiber    | 1.82      | blue        | cellulose            | 0.73  |
|                  |        |        | fiber    | 0.73      | blue        | cellulose            | 0.82  |
|                  |        |        | fiber    | 0.63      | red         | cellulose            | 0.70  |
|                  |        |        | fiber    | 4.07      | transparent | cellulose            | 0.70  |
| <i>S. aurata</i> | Turkey | GIT    | fiber    | 1.72      | black       | cellulose            | 0.80  |
| <i>D. labrax</i> | Italy  | GIT    | fiber    | 2.65      | red         | cellulose            | 0.72  |
|                  |        |        | fiber    | 3.34      | transparent | polyester            | 0.93  |
| <i>S. aurata</i> | Turkey | GIT    | fiber    | 0.37      | black       | cellulose            | 0.79  |
|                  |        |        | fiber    | 0.31      | violet      | cellulose            | 0.81  |
|                  |        |        | fiber    | 0.23      | black       | polyamide            | 0.73  |
|                  |        |        | fiber    | 0.20      | black       | natural wax          | 0.71  |
|                  |        |        | fiber    | 0.78      | black       | natural wax          | 0.75  |
|                  |        | liver  | fiber    | 0.52      | brown       | natural wax          | 0.74  |
| <i>D. labrax</i> | Greece | GIT    | fiber    | 1.81      | transparent | cellulose            | 0.85  |
|                  |        |        | fiber    | 1.46      | black       | cellulose            | 0.83  |
|                  |        |        | fiber    | 1.04      | red         | cellulose            | 0.84  |
| <i>S. aurata</i> | Greece | GIT    | fiber    | 2.08      | black       | polyester            | 0.91  |
|                  |        |        | fiber    | 0.54      | black       | cellulose            | 0.72  |
|                  |        |        | fiber    | 1.09      | red         | polyamide            | 0.71  |
|                  |        |        | fiber    | 0.39      | brown       | natural polyamide    | 0.79  |
|                  |        |        | fiber    | 0.86      | black       | cellulose            | 0.70  |
|                  |        |        | fiber    | 1.59      | black       | polyester            | 0.81  |
| <i>D. labrax</i> | Turkey | GIT    | fiber    | 0.41      | red         | natural wax          | 0.73  |
|                  |        |        | fiber    | 0.18      | black       | natural polyamide    | 0.78  |
|                  |        |        | fiber    | 0.47      | red         | cellulose            | 0.71  |
|                  |        |        | fiber    | 2.30      | black       | polyamide            | 0.74  |
| <i>D. labrax</i> | Greece | GIT    | fiber    | 1.18      | orange      | natural polyamide    | 0.76  |
|                  |        | muscle | fragment | 0.13      | brown       | natural polyamide    | 0.70  |
| <i>S. aurata</i> | Turkey | GIT    | fragment | 0.53      | blue        | epoxy resin          | 0.92  |
|                  |        | muscle | fiber    | 0.30      | black       | cellulose            | 0.71  |
|                  |        |        | fiber    | 1.01      | black       | polyester            | 0.91  |
|                  |        |        | fragment | 1.23      | orange      | natural wax          | 0.85  |
| <i>D. labrax</i> | Greece | GIT    | fragment | 1.01      | red         | natural polyamide    | 0.72  |
|                  |        |        | fiber    | 0.53      | black       | cellulose            | 0.73  |
|                  |        |        | fiber    | 0.50      | black       | polyester            | 0.8   |
|                  |        |        | fiber    | 0.20      | blue        | cellulose            | 0.88  |
|                  |        |        | fiber    | 1.03      | black       | cellulose            | 0.83  |
|                  |        |        | fiber    | 0.37      | transparent | cellulose            | 0.72  |
| <i>S. aurata</i> | Greece | GIT    | fiber    | 0.18      | blue        | cellulose            | 0.80  |
|                  |        |        | fiber    | 0.65      | blue        | cellulose            | 0.89  |
| <i>D. labrax</i> | Turkey | GIT    | fiber    | 0.76      | transparent | cellulose            | 0.88  |
|                  |        |        | fragment | 0.27      | brown       | polyamide            | 0.74  |
|                  |        |        | fiber    | 2.61      | black       | cellulose            | 0.86  |
|                  |        |        | fiber    | 0.57      | blue        | cellulose            | 0.79  |
|                  |        |        | fiber    | 1.85      | transparent | cellulose            | 0.80  |
|                  |        |        | fragment | 0.12      | black       | polypropylene        | 0.87  |
|                  |        |        | fiber    | 3.42      | black       | cellulose            | 0.90  |
|                  |        |        | fragment | 0.22      | orange      | magnesium silicate   | 0.80  |
|                  |        |        | fiber    | 1.05      | blue        | cellulose            | 0.77  |
| <i>S. aurata</i> | Turkey | GIT    | fiber    | 0.30      | transparent | cellulose            | 0.76  |
| <i>S. aurata</i> | Greece | GIT    | fiber    | 0.64      | brown       | cellulose            | 0.72  |
|                  |        |        | fiber    | 1.04      | black       | cellulose            | 0.73  |
