# Supplementary material
Source: MDPI journal article supplement (https://www.mdpi.com/2039-4713/13/4/40)
Supplement: s1 [file s1]

| Species  | Analyzed matrices | Origin | plastics |
|----------|-------------------|--------|----------|
| Seabream | GIT               | Greece | 1        |
|          | muscle            |        |          |
| Seabass  | GIT               | Greece |          |
| Seabass  | GIT               | Italy  |          |
| Seabream | GIT               | Italy  |          |
|          | Liver             |        |          |
|          | muscle            |        |          |
| Seabream | GIT               | Greece |          |
|          | muscle            |        |          |
| Seabass  | GIT               | Greece |          |
| Seabass  | GIT               | Greece |          |
|          | muscle            |        |          |
| Seabass  | GIT               | Turkey |          |
| Seabream | GIT               | Greece |          |
| Seabass  | GIT               | Greece |          |
| Seabream | GIT               | Greece | 2        |
|          | Liver             |        |          |
|          | muscle            |        |          |
| Seabass  | GIT               | Italy  |          |
| Seabream | GIT               | Turkey | 1        |
|          | Liver             |        |          |
|          | muscle            |        |          |
| Seabream | GIT               | Greece |          |
|          | muscle            |        |          |
| Seabass  | GIT               | Turkey | 2        |
|          | muscle            |        |          |
|          | Liver             |        |          |
| Seabream | GIT               | Greece | 1        |
|          | Liver             |        |          |
| Seabass  | GIT               | Greece |          |
|          | Liver             |        |          |
| Seabream | GIT               | Turkey |          |
| Seabass  | GIT               | Italy  | 1        |
| Seabream | GIT               | Turkey | 1        |
|          | muscle            |        |          |
|          | Liver             |        |          |
| Seabream | GIT               | Greece |          |
| Seabass  | GIT               | Greece |          |
| Seabass  | GIT               | Greece |          |
| Seabream | GIT               | Italy  |          |
| Seabass  | GIT               | Turkey |          |
| Seabream | GIT               | Greece | 3        |
| Seabass  | GIT               | Turkey | 1        |
| Seabass  | GIT               | Greece | 1        |
|          | muscle            |        |          |
| Seabream | GIT               | Turkey | 1        |
|          | muscle            |        |          |
| Seabass  | GIT               | Greece | 1        |
| Seabass  | GIT               | Turkey | 2        |
| Seabream | GIT               | Greece |          |
|          | muscle            |        |          |
| Seabream | GIT               | Greece |          |
|          | muscle            |        |          |
| Seabream | GIT               | Turkey |          |

Table S1: List of samples and tissue analyzed.
